# Supplementary material
Source: PubMed Central journal article supplement (PMC2742645)
Supplement: NIHMS132167-supplement-01.pdf [file NIHMS132167-supplement-01.pdf]

Cell Metabolism, *Volume 10*

## **Supplemental Data**

### **Translation Attenuation through eIF2 $\alpha$ Phosphorylation Prevents Oxidative Stress and Maintains the Differentiated State in $\beta$ Cells**

**Sung Hoon Back, Donalyn Scheuner, Jaeseok Han, Benbo Song, Mark Ribick, Junying Wang, Robert D. Gildersleeve, Subramaniam Pennathur, and Randal J. Kaufman**

## Supplemental Results

### Pancreatic $\beta$ -Cell-Specific Expression of Wild-Type (WT) eIF2 $\alpha$ Rescues $\beta$ Cell Loss in Homozygous *eIF2 $\alpha$ A/A* Mutant Mice

Previous studies of mice having an alanine mutation at the Ser51 phosphorylation site in eIF2 $\alpha$  demonstrated that eIF2 $\alpha$  phosphorylation is required for differentiation and/or maintenance of pancreatic beta cells at an embryonic stage and to prevent hypoglycemia in neonates (Scheuner et al., 2001). Three primary questions arise regarding the phenotype of these mice. First, is the beta cell deficiency in these mice caused by an absence of eIF2 $\alpha$  phosphorylation in the beta cell or is it due to an absence of this signal in another cell type that influences beta cell function? Second, why do beta cells fail in the absence of eIF2 $\alpha$  phosphorylation? Finally, what is the relationship between beta cell failure and the neonatal lethal phenotype observed in homozygous *A/A* mice? To address these questions, transgenic mice that express wild-type (wt) eIF2 $\alpha$  specifically in beta cells were derived (Figures S1A-S1D). Beta cell-specific wt *eIF2 $\alpha$*  transgene ( *$\beta$ -Tg*) expression restored beta cell mass and ultrastructure in homozygous *A/A* embryos (Figures S1E-S1G), indicating that the beta cell death associated with Ser51Ala mutation is due to a lack of eIF2 $\alpha$  phosphorylation in the beta cell. However, beta cell-specific wt eIF2 $\alpha$  expression did not prevent the postnatal lethality (Table S1), suggesting neonatal viability requires eIF2 $\alpha$  phosphorylation in cell types additional to the beta cell.

### ATF4 Is Not Required for $\beta$ Cell Function

To examine the role of ATF4 in beta cells, we evaluated glucose homeostasis islet morphology, and pancreatic cell death in *Atf4*-null mice. Although most homozygous *Atf4*-null mice die during embryonic, postnatal, or neonatal stages (Hettmann et al., 2000), the blood glucose levels and GTTs measured in a limited number of wild-type (wt) and homozygous *Atf4*-null mice were not significantly different when they were fed either standard chow or challenged with a high-fat (HF) diet for 9 weeks (Figures S9A, S9B, and data not shown). Although morphological analysis and insulin and glucagon immunofluorescence revealed that the islets of *Atf4*-null mice appeared normal (Figures S9C and S9D), there was severe exocrine pancreas atrophy and a high frequency of apoptotic exocrine cells in sections of *Atf4*-null mice (Figure S9E). These experiments show that ATF4 is not required to preserve beta cell function, suggesting that decreased *Atf4* mRNA translation due to defective eIF2 $\alpha$  phosphorylation in *fTg*-deleted *A/A;fTg/0;CreER/0* mutant mice is unlikely a cause for the beta cell failure.

## Supplemental Discussion

Our finding that eIF2 $\alpha$  phosphorylation is required for function and survival of differentiated beta cells contrasts with observations from analysis of beta cell-specific *Perk*-deletion that led to the proposal that PERK is not required to maintain function of differentiated beta cells (Zhang et al., 2006). There are several possible reasons that may account for the different observations. First, in contrast to deletions of any single eIF2 $\alpha$  kinase gene, it is possible that the homozygous *A/A* mutation has a more dramatic phenotype due to the absence of basal eIF2 $\alpha$  phosphorylation and constitutive attenuation of protein synthesis. Second, it is possible that cells adapt to PERK deficiency by compensatory mechanisms. Where *Perk*-deletion caused abnormal proinsulin accumulation in the ER in neonatal mice, proinsulin localization was normalized at 30 days after birth (see Zhang et al., *Cell Metab*, 2006, 4, 491-497, Figures 4H and 4I) (Zhang et al., 2006). In contrast, we observed that abnormal proinsulin ER localization became more severe with time after beta cell-specific deletion of the *fTg* in *A/A;fTg/0;CreER/0* mice. This suggests that a compensatory pathway, possibly mediated by increased signaling through alternative eIF2 $\alpha$  kinases, may restore function to *Perk*-deleted beta cells. Indeed, studies suggest that GCN2 and PKR may phosphorylate eIF2 $\alpha$  in response to ER stress (Hamanaka et al., 2005; Jiang et al., 2004; Onuki et al., 2004; Srivastava et al., 1995). These compensatory eIF2 $\alpha$  kinase signaling pathways would not be effective in beta cells from Tam-treated *A/A;fTg/0;CreER/0* mice because their primary substrate for phosphorylation is absent. Finally, recent studies demonstrate repopulation of beta cell mass can occur after massive beta cell destruction (Cano et al., 2008; Nir et al., 2007). Since Zhang et al. (Zhang et al., 2006) utilized mice with two floxed *Perk* alleles, it is possible that islet mass is repopulated with cells that do not harbor deletion of both floxed *Perk* alleles. Since the *A/A;fTg/0;CreER/0* mice we have studied have a single copy of the *eIF2 $\alpha$  fTg*, a single recombination event will generate eIF2 $\alpha$  phosphorylation-deficient cells. Direct analysis of deletion efficiency and eIF2 $\alpha$  phosphorylation in the islets of *Perk*-deleted adult mice should provide insight into the potential for recovery of cells that activate compensatory eIF2 $\alpha$  phosphorylation pathways or escape complete *Perk* deletion. In our analysis it was possible to directly detect transgene-deleted cells by expression of EGFP. Our findings that show a selective loss of the EGFP-positive beta cells occurs in *A/A;fTg/0;CreER/0* mice upon deletion of the *eIF2 $\alpha$  fTg* convincingly demonstrate that eIF2 $\alpha$  phosphorylation is required for beta cell function and/or survival.

The strain differences are another possible reason for the different observations (Berglund et al., 2008; Clee and Attie, 2007; Mathews et al., 2004; Zraika et al., 2006). Beta cell specific *Perk*-deleted ( *$\beta$ PKO*) mice were derived from *Perk*-null (*PKO*) mice in either C57BL6/6J or 129SvEvTac backgrounds or mixtures of both. Our experiments were performed in *A/A;fTg/0;CreER/0* mice with a C57BL/6J, SJL, and CD-1 background (See Animal breeding schemes in Supplemental Experimental Procedures). It is possible that genetic background(s) in *A/A;fTg/0;CreER/0* mice may contribute susceptibility for beta cell death by modulating accumulation of misfolded proteins in the ER lumen, controlling ROS production, and/or altering cell death signaling mechanisms. It is also possible that genetic trait(s) responsible for ER stress- and ROS-mediated beta cell death may be removed or diluted by our multiple breeding scheme to generate *A/A;fTg/0;CreER/0* mice. To date, it is unknown how mouse genetic background may contribute to ER stress-mediated beta cell death.

## Supplemental Experimental Procedures

### Construction of a $\beta$ -Cell-Specific *eIF2 $\alpha$* Transgene Vector ( $\beta$ -Tg) and Characterization of $\beta$ -Tg Copy Number and Expression Level in Transgenic Mice

The 0.9 kb murine wt *eIF2 $\alpha$*  cDNA was inserted into the RIP vector (a gift of Dr. Richard D. Palmiter, University of Washington) containing the rat *Insulin II* promoter (RIP) and intron, along with the mouse major histocompatibility complex *E $\alpha$  II* polyadenylation sequence (pA) (Figure S1A) (D'Alessio et al., 1994).

The transgenic construct ( $\beta$ -Tg) was microinjected into C57BL/6JxSJL fertilized embryos and they were implanted into pseudopregnant females. Transgenic founder mice (*S/S; $\beta$ -Tg/0*) were identified by PCR-based genotyping of tail DNA with the primer pair (*Ins- $\beta$ -Tg*) described in Table S4. Three transgenic founders (*S/S; $\beta$ -Tg/0*) were isolated. One transgenic founder 3\* was chosen for detailed Southern blot analysis of genomic DNA for  $\beta$ -Tg copy number (Figure S1B) and quantitative RT-PCR measurement of the total *eIF2 $\alpha$*  mRNA level from isolated islets (Figure S1C). The beta cell-specific expression of *eIF2 $\alpha$*  mRNA driven from  $\beta$ -Tg was also confirmed by semi-quantitative RT-PCR analysis in isolated tissues from transgenic founder 3\* (Figure S1D).

### Construction of a Floxed *eIF2 $\alpha$* Transgene Containing Vector (*fTg*) and Characterization of *fTg* Copy Number and Expression Level in Transgenic Mice

The 0.9 kb murine wt *eIF2 $\alpha$*  cDNA was inserted into between Sall and XmaI site of pDNR-CMV plasmid (CLONTECH) to generate pDNR-CMV-LoxP-*eIF2 $\alpha$*  which has one *loxP* site in front of the *eIF2 $\alpha$*  cDNA. To generate pCMV-LoxP-*eIF2 $\alpha$* -LoxP that is flanked by *loxP* sites, the NotI fragment from pDNR-CMV was inserted into the XmaI site of pDNR-CMV-LoxP-*eIF2 $\alpha$* . To generate pCMV-LoxP-*eIF2 $\alpha$* -LoxP-EGFP, the NotI and Sall fragment of pCMV-LoxP-*eIF2 $\alpha$* -LoxP was then inserted into pEGFP-N1 to position the *EGFP* sequence downstream of the *eIF2 $\alpha$*  cDNA. The 2 kb NotI fragment (LoxP-*eIF2 $\alpha$* -LoxP-EGFP) from pCMV-LoxP-*eIF2 $\alpha$* -LoxP-EGFP was inserted into pCX-EGFP digested with EcoRI to generate pCX-LoxP-*eIF2 $\alpha$* -LoxP-EGFP.

A 4.4 kb floxed *eIF2 $\alpha$*  fragment (*fTg*) from pCX-LoxP-*eIF2 $\alpha$* -LoxP-EGFP was released by SspI and SfiI restriction enzyme digestion, purified by gel fractionation, and microinjected into C57BL/6JxSJL fertilized embryos utilizing standard procedures. Injected embryos were implanted into pseudopregnant females. Transgenic founder mice (*S/S;fTg/0*) were identified by PCR-based genotyping of tail DNA with three primer sets (Enh-Pro, *eIF2 $\alpha$* -EGFP, and EGFP) described in Table S4. Southern blot (Figure S2A) and Northern blot analyses (Figures S2C and S2D) of 21 PCR positive-transgenic founders led to the selection of one transgenic founder (Figure S2A, Founder 11\* and Figure S2C transgenic mouse 7\*). Founder 11\* (*S/S;fTg/0*) has a single copy of the transgene (*LoxP-eIF2 $\alpha$ -LoxP-EGFP*), determined by Southern blot analysis (Figure S2B). The expression of floxed *eIF2 $\alpha$*  *fTg* mRNA was confirmed by Northern blot analysis of multiple tissues (Figure S2D). The level of wt *eIF2 $\alpha$*  protein derived from floxed *eIF2 $\alpha$*  *fTg* mRNA in islets was confirmed by Western blot analysis using rabbit anti-*eIF2 $\alpha$*  antibody (Cell Signaling Technology) and mouse anti- $\alpha$ -Tubulin antibody (Sigma), and quantified by the Scion image program (Scion Corporation) (Figures S2E and F)

## Southern and Northern Blot Analysis

Southern and Northern blot analyses were performed as previously described. (Back et al., 2006; Lee et al., 2002). <sup>32</sup>P-labeled probes were prepared using a random prime labeling system (Amersham Pharmacia). Southern blot analysis was performed with a probe derived from either a 1 kb BglII fragment containing the *eIF2 $\alpha$*  cDNA from the beta cell-specific targeting vector  $\beta$ -*Tg* (Figure S1B) or a 0.8 kb PCR product containing the *EGFP* cDNA from pCX-LoxP-eIF2 $\alpha$ -LoxP-EGFP vector (Figures S2A and S2B). The PCR product was amplified with Forward primer: 5'-GTCGACCGGTCCGACCA-3' and Reverse primer: 5'-AGATCTCAGTGGTATTTG-3'. Band intensities were quantified by phosphorimaging. Northern blot analysis was performed using probes derived from either a 0.7 kb XmnI-XmaI fragment containing the *eIF2 $\alpha$*  cDNA from the pCX-LoxP-eIF2 $\alpha$ -LoxP-EGFP vector (Figure S2C) or the same *EGFP* cDNA used for Southern Blotting (Figure S2D).

## Animal Breeding Schemes

***eIF2 $\alpha$   $\beta$ -Tg ( $\beta$ -Tg/0) Mice.*** A transgenic founder 3\* (S/S; $\beta$ -Tg/0, mixed background of C57BL/6J and SJL) was backcrossed to heterozygous S/A (backcrossed onto a C57BL/6J background for more than 10 generations) mice to produce S/A; $\beta$ -Tg/0 strains that were bred with S/A mice to generate experimental progeny: S/S;0/0, S/S; $\beta$ -Tg/0, S/A;0/0, S/A; $\beta$ -Tg/0, A/A;0/0, and A/A; $\beta$ -Tg/0.

***eIF2 $\alpha$  fTg (fTg/0) Mice.*** A transgenic founder 11\* (S/S;fTg/0, mixed background of C57BL/6J and SJL) was bred with heterozygous S/A (backcrossed onto a C57BL/6J background for more than 10 generations) mice to obtain S/A;fTg/0 mice. Secondly, S/A;fTg/0 mice were crossed with heterozygous S/A mice to obtain A/A;fTg/0 progeny. A/A;fTg/0 mice were interbred to maintain the strain. S/A;*CreER*/0 mice (mixed background of C57BL/6J and CD-1) were generated by breeding heterozygous S/A mice with *CreER*/0 mice (mixed background of C57BL/6J and CD-1). A/A;fTg/0 mice were crossed with S/A;*CreER*/0 mice (heterozygous S/A mice carrying Cre recombinase) to produce progeny for experiments: S/A;0/0;0/0, S/A;0/0;*CreER*/0, S/A;fTg/0;0/0, S/A;fTg/0;*CreER*/0, A/A;0/0;0/0, A/A;0/0;*CreER*/0, A/A;fTg/0;0/0, A/A;fTg/0;*CreER*/0. Genotypes of the mice were identified by PCR-based genotyping of tail DNA with the primer pairs described in Table S4.

## Measurements of Protein Synthesis

Islets were washed two times in Krebs's Ringer-bicarbonate buffer (115 mM NaCl, 5mM KCl, 10 mM NaHCO<sub>3</sub>, 2.5 mM MgCl<sub>2</sub>, 2.5 mM CaCl<sub>2</sub>, and 20 mM HEPES [pH 7.4], 0.1% BSA) containing 2.8 mM glucose and preincubated in the same buffer 1 hr at 37 °C. Centrifugation was performed and islets were exchanged into incubation buffer (2.8 or 16.7 mM glucose) for 1 hr at 37 °C. During the last 20 min of incubation, 50  $\mu$ Ci [<sup>35</sup>S] methionine (Met) and cysteine (Cys) (TRAN<sup>35</sup>S-LABEL™, MP Biomedical, Inc.) was added. Metabolic labeling was terminated with ice-cold Krebs's buffer containing unlabeled Met (0.6 mg/ml) and Cys (0.96 mg/ml) and two further washes were performed. The islet pellets were lysed in 50  $\mu$ l of lysis buffer (50 mM Tris-Cl [pH 8.0], 150 mM NaCl, 1% NP-40, 1% SDS, and protease inhibitors), sonicated at 4 °C for 15 min, and cleared by centrifugation at 12,000g for 10 min at 4 °C. Three aliquots of 5  $\mu$ l each were taken for measurement of total protein synthesis by trichloroacetic acid (TCA) precipitation on Whatman filter paper. Duplicate aliquots of 5  $\mu$ l each from the remainder of the radiolabeled lysate were assayed for total protein concentration by Bio-Rad DC protein assay kit.

Proinsulin synthesis was measured by immunoprecipitation of 50  $\mu$ g of whole lysate protein per sample with 5  $\mu$ g of mouse anti-proinsulin antibody (HyTest Ltd.). Immunoprecipitated proteins were resolved on a 10% Bis-Tris acrylamide gel (Criterion<sup>TM</sup> XT precast gel, Bio-Rad). The incorporation of [<sup>35</sup>S] Met or Cys into proinsulin was quantified by phosphorimaging.

#### **Atf 4 Null Mice and HF Diet Study**

*Atf4* (*Creb-2*)-null mice were a gift from Dr. Jeffrey M. Leiden (Hettmann et al., 2000). *Atf4*<sup>+/+</sup> and *Atf4*<sup>-/-</sup> mice at 8-10 weeks of age were housed pair-wise and fed a 45% HF diet (Research Diets Inc. D12451) for up to 9 weeks.

#### **Cell Culture**

Wild-type *S/S* and homozygous *A/A* immortalized hepatocytes were cultured as described previously. (Sakaki et al., 2008)

#### **Statistical Analysis**

All data are presented as means  $\pm$  SEM. Statistical significance of difference between groups was evaluated using a Student t-test or ANOVA one-way test (Tukey's test).  $P < 0.05$  was considered significant. \* $P < 0.05$ , \*\* $P < 0.01$ , \*\*\* $P < 0.001$ .

All other procedures for Supplemental Experimental Procedures are described in EXPERIMENTAL PROCEDURES of main text.

**Table S1. Survival ratio of neonatal progeny (n=75)  
from breeding of *S/A;β-Tg/0* X *S/A* mice**

| Genotype                  | S/S             | S/A             | A/A                     |
|---------------------------|-----------------|-----------------|-------------------------|
| <i>β-Tg (-)</i>           | 10/75<br>(0.13) | 20/75<br>(0.27) | 4(dead*)/75<br>(0.05)   |
| <i>β-Tg (+)</i>           | 8/75<br>(0.11)  | 23/75<br>(0.31) | 10 (dead*)/75<br>(0.13) |
| <b>Expected frequency</b> | <b>0.125</b>    | <b>0.25</b>     | <b>0.125</b>            |

The pups (dead\*) were dead within 24 hr after birth

**Table S2. Survival ratio of young progeny (1~2 months old)  
from breeding of *A/A;fTg/0* X *S/A* mice**

| Genotype:           | <i>S/A</i>       | <i>S/A:fTg/0</i> | <i>A/A</i>        | <i>A/A:fTg/0</i> |
|---------------------|------------------|------------------|-------------------|------------------|
| Observed:           | 45/139<br>(0.32) | 49/139<br>(0.35) | N.D               | 45/139<br>(0.32) |
| Expected frequency: | <b>0.33</b>      | <b>0.33</b>      | <b>(all dead)</b> | <b>0.33</b>      |

N.D : not detected

**Table S3. Body mass of young progeny (1 month old)  
from breeding of *A/A;fTg/0* X *S/A* mice**

| Genotype:   | <i>S/A</i>      | <i>S/A:fTg/0</i> | <i>A/A</i> | <i>A/A:fTg/0</i> |
|-------------|-----------------|------------------|------------|------------------|
| Male (g):   | 19.6±0.60 (n=6) | 18.6±0.78 (n=18) | N.D        | 18.6±0.03 (n=18) |
| Female (g): | 15.6±0.35 (n=6) | 16.2±0.25 (n=18) | N.D        | 14.8±0.50 (n=16) |

N.D : not detected

Table 4. PCR primers

| Gene name         | 5' oligonucleotide           | 3' oligonucleotide         | Usage                                          |
|-------------------|------------------------------|----------------------------|------------------------------------------------|
| 18S rRNA          | CGCTTCCTTACCTGGTTGAT         | GAGCGACCAAGGAAACATA        | q-PCR                                          |
| beta actin        | GATCTGGCAACACACCTTCT         | GGGGTGTGAAAGGTCTCAA        | q-PCR                                          |
| A20               | TGGTTCCAATTTTCTCCTT          | CGTTGATCAGGTGAGTCGTG       | q-PCR                                          |
| Atf4              | ATGGCCGGCTATGGATGAT          | CGAAGTCAAACCTTTTCAGATCCATT | q-PCR                                          |
| Bak               | CCTGAAACCTTGGCCCT            | AGCCGTGCAAAGACGAAAGAC      | q-PCR                                          |
| Bax               | GGAGCAGCTTGGGAGCG            | AAAAGGCCCTGTCTTCATGA       | q-PCR                                          |
| Bcl2              | ACTTCGCAGAGATGTCCAATCA       | TGGCAAAGCGTCCCCTC          | q-PCR                                          |
| Bcl-xl            | GTAACCTGGGTGCGCATTGT         | TGGATCCAAGGCTCTAGGTG       | q-PCR                                          |
| Beta2             | GCAAACCTGAAATCAAAACCAA       | GGATTGTTATCAAAGTTGAAAGATG  | q-PCR                                          |
| Bim               | GGAGATACGGATTGCACAGGAG       | CCTTCTCCATACCAGACGGAG      | q-PCR                                          |
| BiP               | GGTGACGACGGACATCAAGTT        | CCACCTCCAATATCAACTTGA      | q-PCR                                          |
| Catalase (Cat)    | ACCCCTTATACCAAGTTGGC         | GCATGCACATGGGGCCATCA       | q-PCR                                          |
| Cebpa             | TGGACAAGAACGCAACGAG          | TCACTGGTCACTCCAGCAC        | q-PCR                                          |
| Chop              | CTGCCCTTTCACCTTGGAGAC        | CGTTTTCTGGGGATGAGATA       | q-PCR                                          |
| Dr5               | ATAAAAAGAGGCTGTGAACGGG       | GGTCCAAGAGAGACGA           | q-PCR                                          |
| Edem1             | GCAATGAAGGAGAAGGAGACCC       | TAGAAGGCGTGTAGGCAGATGG     | q-PCR                                          |
| Erdj4             | GAATTAATCCTGGCCTCCAA         | CAGGGTGGTACTTCATGGCT       | q-PCR                                          |
| Ero1a             | GCATTGAAGAGGTGAGCAA          | ATCATGCTTGGTCCACTGAA       | q-PCR                                          |
| Ero1b             | GGGCCAAGCTATTAAGGAA          | TTTATCGCAACCAACACAGT       | q-PCR                                          |
| Erp72             | AGTCAAGGTGTGGTGGGAAAG        | TGGAGCAAATAGATGGTAGGG      | q-PCR                                          |
| Fas               | AACCAGACTTCTACTGCGATTCTCC    | CCTTTCCAGCCTTTCTTTCCG      | q-PCR                                          |
| Fkbp11            | ACACGCTCCACATACACTACACGG     | ATGACTGCTCTTCGCTTCTCTCC    | q-PCR                                          |
| Gadd34            | CCCGAGATTCTCTAAAAGC          | CCAGACAGCAAGGAAATGG        | q-PCR                                          |
| Glucagon (Gcg)    | AAACCAAGATCACTGACAAGAAATAGGT | TTTGAATTGTACATCCCAAGTGC    | q-PCR                                          |
| Glut2             | CAATTACCGACAGCCCATCC         | TCTGAGAAGTCTGGGCC          | q-PCR                                          |
| Gpx1              | ACAGTCCACCGTGTATGCCTTC       | CTCTTATTCTTCCATTCTCTG      | q-PCR                                          |
| Gpx2              | GAAAGACAAGCTGCCCTACC         | TCATATGATGAGCTTGGGA        | q-PCR                                          |
| Gpr94             | AATAGAAAGAAATGCTTCGCC        | TCTTCAGGCTCTTCTCTGG        | q-PCR                                          |
| Ho1               | CCACACAGCACTATGTAAGCGTC      | GTTGGGAAAGTAAAAAAGCC       | q-PCR                                          |
| Herpud1           | AGCAGCCGGACAACCTAAT          | CTTGGAAAGTCTGCTGGACA       | q-PCR                                          |
| Herpud2           | CCACAATGTGGACGCTAAC          | CTTCACTGCATCTTCTCCA        | q-PCR                                          |
| Hrd1              | TGGCTTGTAGTACGCCATTCT        | CCACGGAGTGCAGCACATAC       | q-PCR                                          |
| Iapp              | CCTCATCTCTCTGTGGCAC          | CACGTTGGTTGGTGGGAG         | q-PCR                                          |
| Ins1              | GCAAGCAGGTCAATGTTTCAAC       | AAGCCTGGTGGGTTTGG          | q-PCR                                          |
| Ins2              | TTTGTCAAAGCAGCACTTTG         | GGTCTGAAGTCACTGCTC         | q-PCR                                          |
| MafA              | GCTGGTATCCATGTCCGTGC         | GTCCGATGACCTCCTCCTTG       | q-PCR                                          |
| Ngn3              | GTGTTACCTTCCCAAG             | CTAGGGCTTTCCGGTTACA        | q-PCR                                          |
| Noxa              | CGCCAGTGAACCCAAAG            | TTATGTCCGGTGCCTCCAC        | q-PCR                                          |
| p21               | CGAGAACGGTGAACCTTTGAC        | TCCAGACGAAAGTTGCCCT        | q-PCR                                          |
| p53               | AAAACCACTGTATGGAGATATTCA     | GCTCCCGGAACATCTCGAA        | q-PCR                                          |
| p58 <sup>PK</sup> | TCCTGGTGGACCTGCAGTACG        | CTCGAGTAATTCTTCCCC         | q-PCR                                          |
| Pdx1              | GAGCGTTCATAACGACCA           | TCAGCCGTTCTGTTTCTGGG       | q-PCR                                          |
| Pgc1a             | AACCACACCCACAGGATCAGA        | TCTTCGCTTTATTGCTCCATGA     | q-PCR                                          |
| Pgc1b             | CTTGCTAACATCACAAGGATATCTTG   | GGCAGGTTCAACCCCGA          | q-PCR                                          |
| Ppara             | ACGATGCTGTCTCTTGTATG         | GTGTGATAAAGCCATTGCCGT      | q-PCR                                          |
| Pparγ             | AGTGGAGACCCGCGAGG            | GACGAGGTTGTCTGGATGT        | q-PCR                                          |
| Pdi               | CAAGATCAAGCCCCACTGAT         | AGTTCCGCCCAACCACTT         | q-PCR                                          |
| Sod1              | GGCCCGCGGATGA                | CGTCTTTCCAGCAGTACA         | q-PCR                                          |
| Sod2              | GGGTTGGCTTGGTTTCAATAAGGAA    | AGGTAGTAAGCGTGTCCACACAT    | q-PCR                                          |
| Tnfa              | CCCTCACACTCAGATCATCTTCT      | GCTACGACGTGGGCTACAG        | q-PCR                                          |
| Tnfr1             | CATCCCCAAGCAAGAGTCATG        | GCTACAGACGTTCCAGATGC       | q-PCR                                          |
| Trb3              | TCTCTCCGCAAGGAACTT           | TCTCAAACGAGGATGCAAGAG      | q-PCR                                          |
| Ubc7              | TCCTCCAGAAGGAATCGTG          | AAGTGGGAAACTCAGGATGG       | q-PCR                                          |
| Ucp2              | TACCAGAGCACTGTGGAAGCC        | AGTCCCTTCCAGAGGCC          | q-PCR                                          |
| Wars              | CCTTGGACTACACAGCCAGGA        | CTAGGACCGAGGCCTGCA         | q-PCR                                          |
| Wfs               | GTAGCAAGTGCCCGTCTTC          | TGCAGTTGAGGCAGCTGATG       | q-PCR                                          |
| Xbp1-spliced      | GAGTCCGACAGGTTG              | GTGTACAGATCCATGGGA         | q-PCR                                          |
| Xbp1-total        | AAGAACAAGCTTGGGAATGG         | ACTCCCTTGGCCCTCCAC         | q-PCR                                          |
| Total eIF2α       | CCTGGATACGGTGCCTACG          | TGTGGGGTCAAAGCCTATT        | q-PCR for endogenous <i>eIF2α</i> + <i>flg</i> |
| Endo eIF2α        | ACTTCGGGATTCACACATCC         | GCCAACTCGATCAGTTTGT        | q-PCR for endogenous <i>eIF2α</i>              |
| eIF2α transgene   | GCTGGTGTGTGCTGTCTC           | CCACCTCAGGAAATTTGTGT       | q-PCR for <i>flg</i>                           |
| β-Tg              | GAAACCATGACGCAAGCAGGT        | GCCAATTCCGATCAGTTTGT       | RT-PCR for β-Tg                                |
| eIF2α(S51A)       | CACACACCCATTCCATGATAGTAATG   | CAATGTTGTAGCCCTGACAAAGG    | Genotyping for S/A mutant allele               |
| Ins-β-Tg          | CCAGCCCTAAGTGACCAAGCTAC      | GCCAATTCCGATCAGTTTGT       | Genotyping for β-Tg                            |
| Enh-Pro           | CGACATTGATTATTGACTAG         | GTAAATAGGATGACTAATAC       | Genotyping for <i>flg</i>                      |
| eIF2α-EGFP        | TGGTTATGAAGGCATTGATG         | GCGGACTTGAAGAAGTCTGTG      | Genotyping for <i>flg</i>                      |
| EGFP              | TATATCATGGCCGACAAAGCA        | GAACTCCAGCAGGACCATGT       | Genotyping for <i>flg</i>                      |
| CRE               | GCGGCTCGGCAGTAAAACTATC       | GTGAAACAGCAATTGCTGTCACTT   | Genotyping for CreER                           |
| CREB-2 (WT)       | GCAGCAGTGTGCTGTAACGGAC       | CTGGCCAAGCCATCATCCATAGC    | Genotyping for <i>Atf4</i> wt allele           |
| CREB-2 (Null)     | TTTGAGTTGTGCGCTCGGGTGTG      | GCTACCGGTGGATGTGGAATGT     | Genotyping for <i>Atf4</i> null allele         |



Figure S1

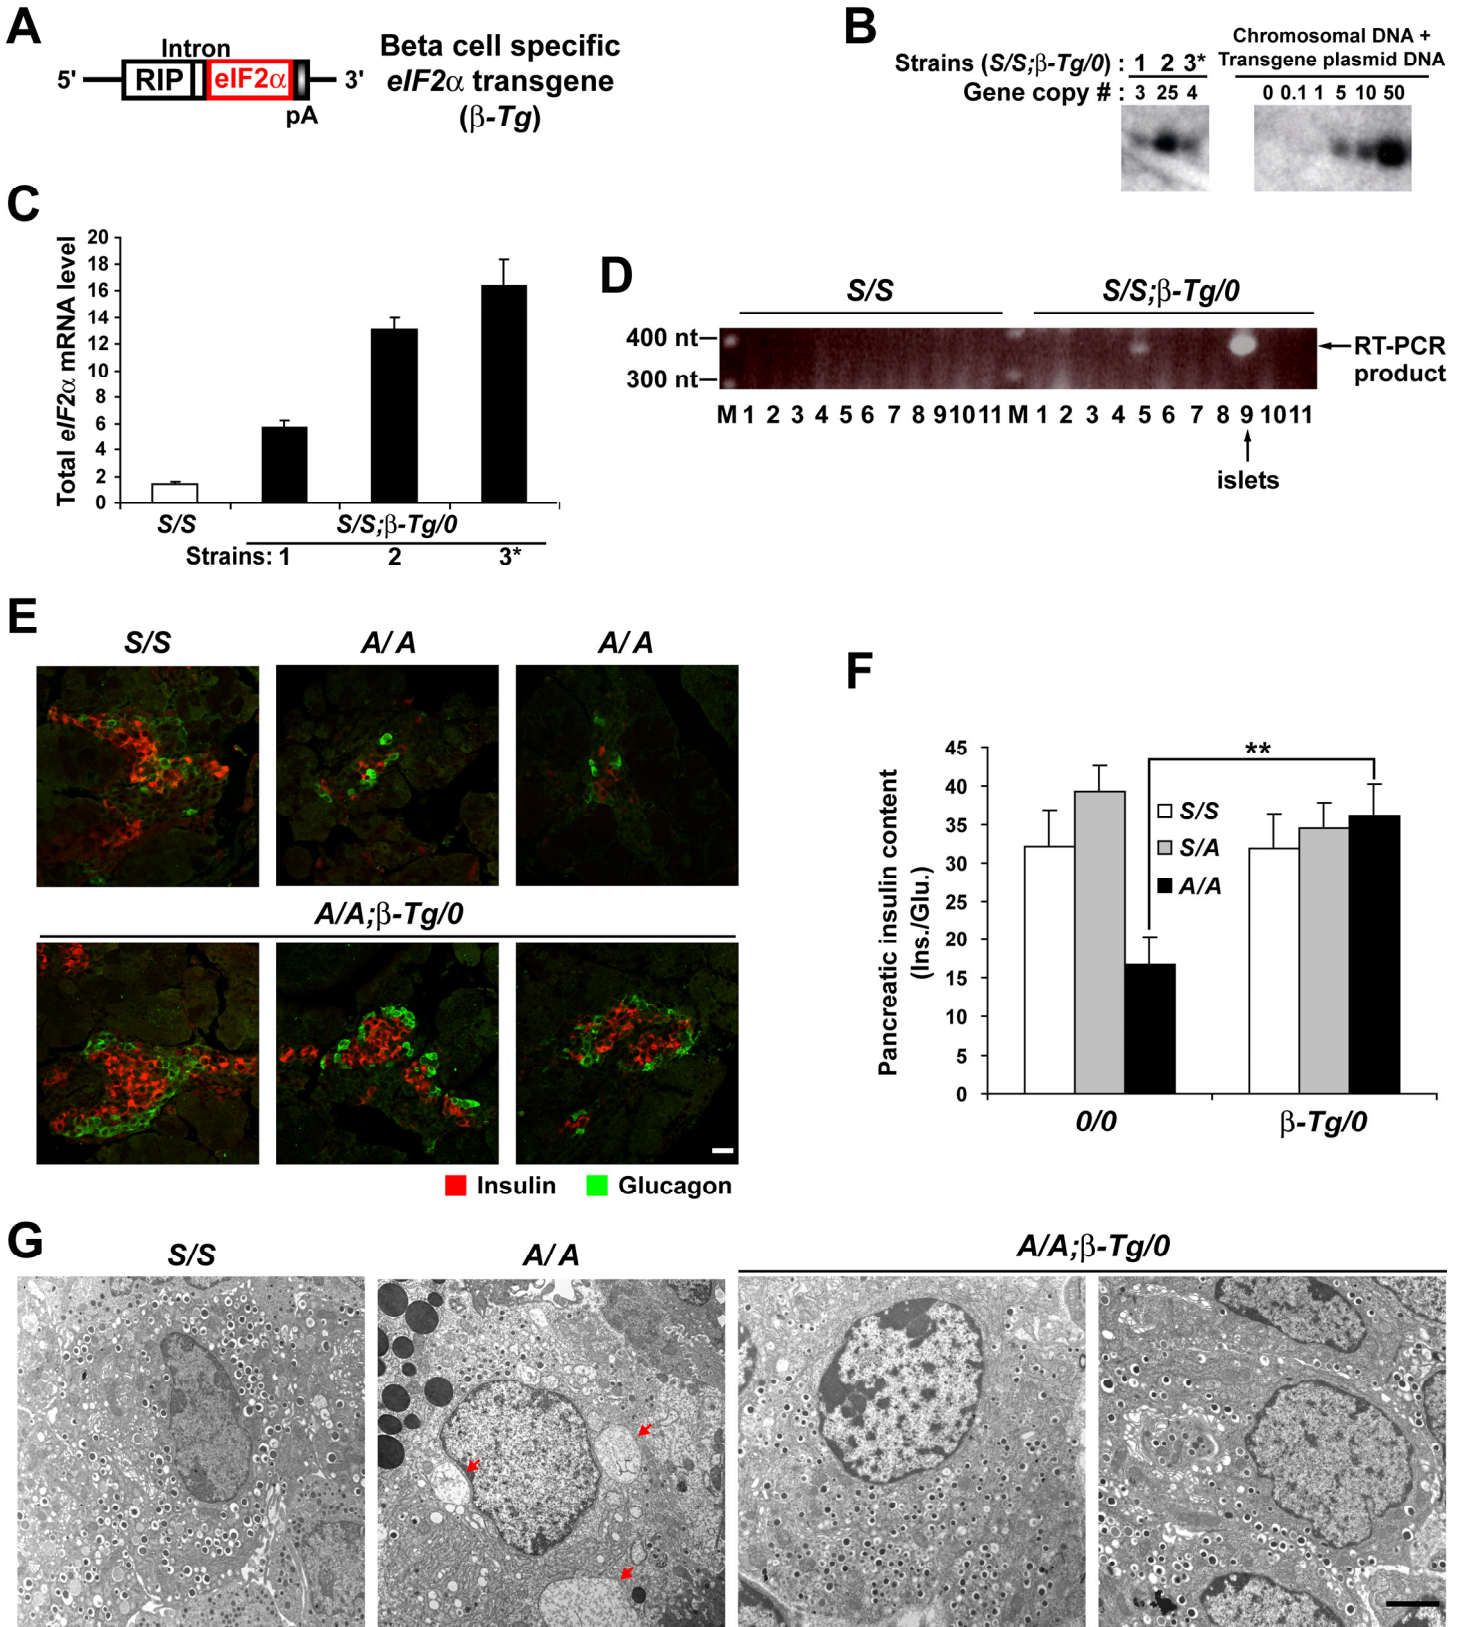

**Figure S1.  $\beta$ -Cell-Specific Expression of Wild-Type (WT) *eIF2 $\alpha$*  ( $\beta$ -Tg) Prevents  $\beta$  Cell Loss and Restores Islet Morphology and  $\beta$  Cell Ultrastructure in Homozygous *eIF2 $\alpha$*  A/A Embryos**

(A) Diagram depicts the structure of the wt *eIF2 $\alpha$*  transgene ( $\beta$ -Tg) for expression in pancreatic beta cells. RIP and pA represent the rat *insulin II* promoter and the mouse major histocompatibility complex *E $\alpha$  II* polyadenylation sequence, respectively.

(B) BglIII-digested genomic DNA from three different transgenic founders (*S/S; $\beta$ -Tg/0*) was analyzed by Southern blotting using *eIF2 $\alpha$*  cDNA as a hybridization probe. Estimation of transgene copy number was performed by comparison of band intensities with 0-50 copies of  $\beta$ -Tg plasmid DNA. The progeny of founder 3\* were utilized in further experiments (Figures S1C-S1G).

(C) Total *eIF2 $\alpha$*  mRNA levels in isolated islets of progeny from three different transgenic founders were compared to wt control mice at 12 wks of age. Total *eIF2 $\alpha$*  mRNA levels were measured by quantitative real-time PCR analysis with a primer pair (Total *eIF2 $\alpha$* ) that recognizes both endogenous and transgene-derived *eIF2 $\alpha$*  mRNA. n=3 per group.

(D) Expression of  $\beta$ -Tg in multiple tissues was analyzed by semi-quantitative RT-PCR. Total RNA was extracted from different organs, 1-brain, 2-brown fat tissue, 3-heart, 4-intestine, 5-kidney, 6-liver, 7-lung, 8-muscle, 9-pancreatic islets, 10-spleen, 11-white fat tissue, of wt (*S/S*) and a transgenic mouse (*S/S; $\beta$ -Tg/0*) and RT-PCR was performed with primers ( $\beta$ -Tg) spanning the 5' intron of  $\beta$ -Tg (Figure S1A).

(E) Insulin and glucagon immunolabeling was performed to visualize islet morphology in pancreas tissue sections obtained from E18.5 embryos. Representative fluorescence images are shown. The scale bar represents 20  $\mu$ M.

(F) The  $\beta$ -Tg transgene rescues insulin content in pancreata from homozygous A/A mutant embryos. Measurements of pancreatic insulin content (Ins) were normalized to glucagon (Glu). n= 4-19 E18.5 embryos per group.

(G) Representative transmission electron micrographs from pancreatic sections of E18.5 embryos are shown. Arrows indicate regions of severe ER distention. The scale bars represents 2  $\mu$ m.

Data are Mean  $\pm$  SEM, (C) and (E).

Figure S2

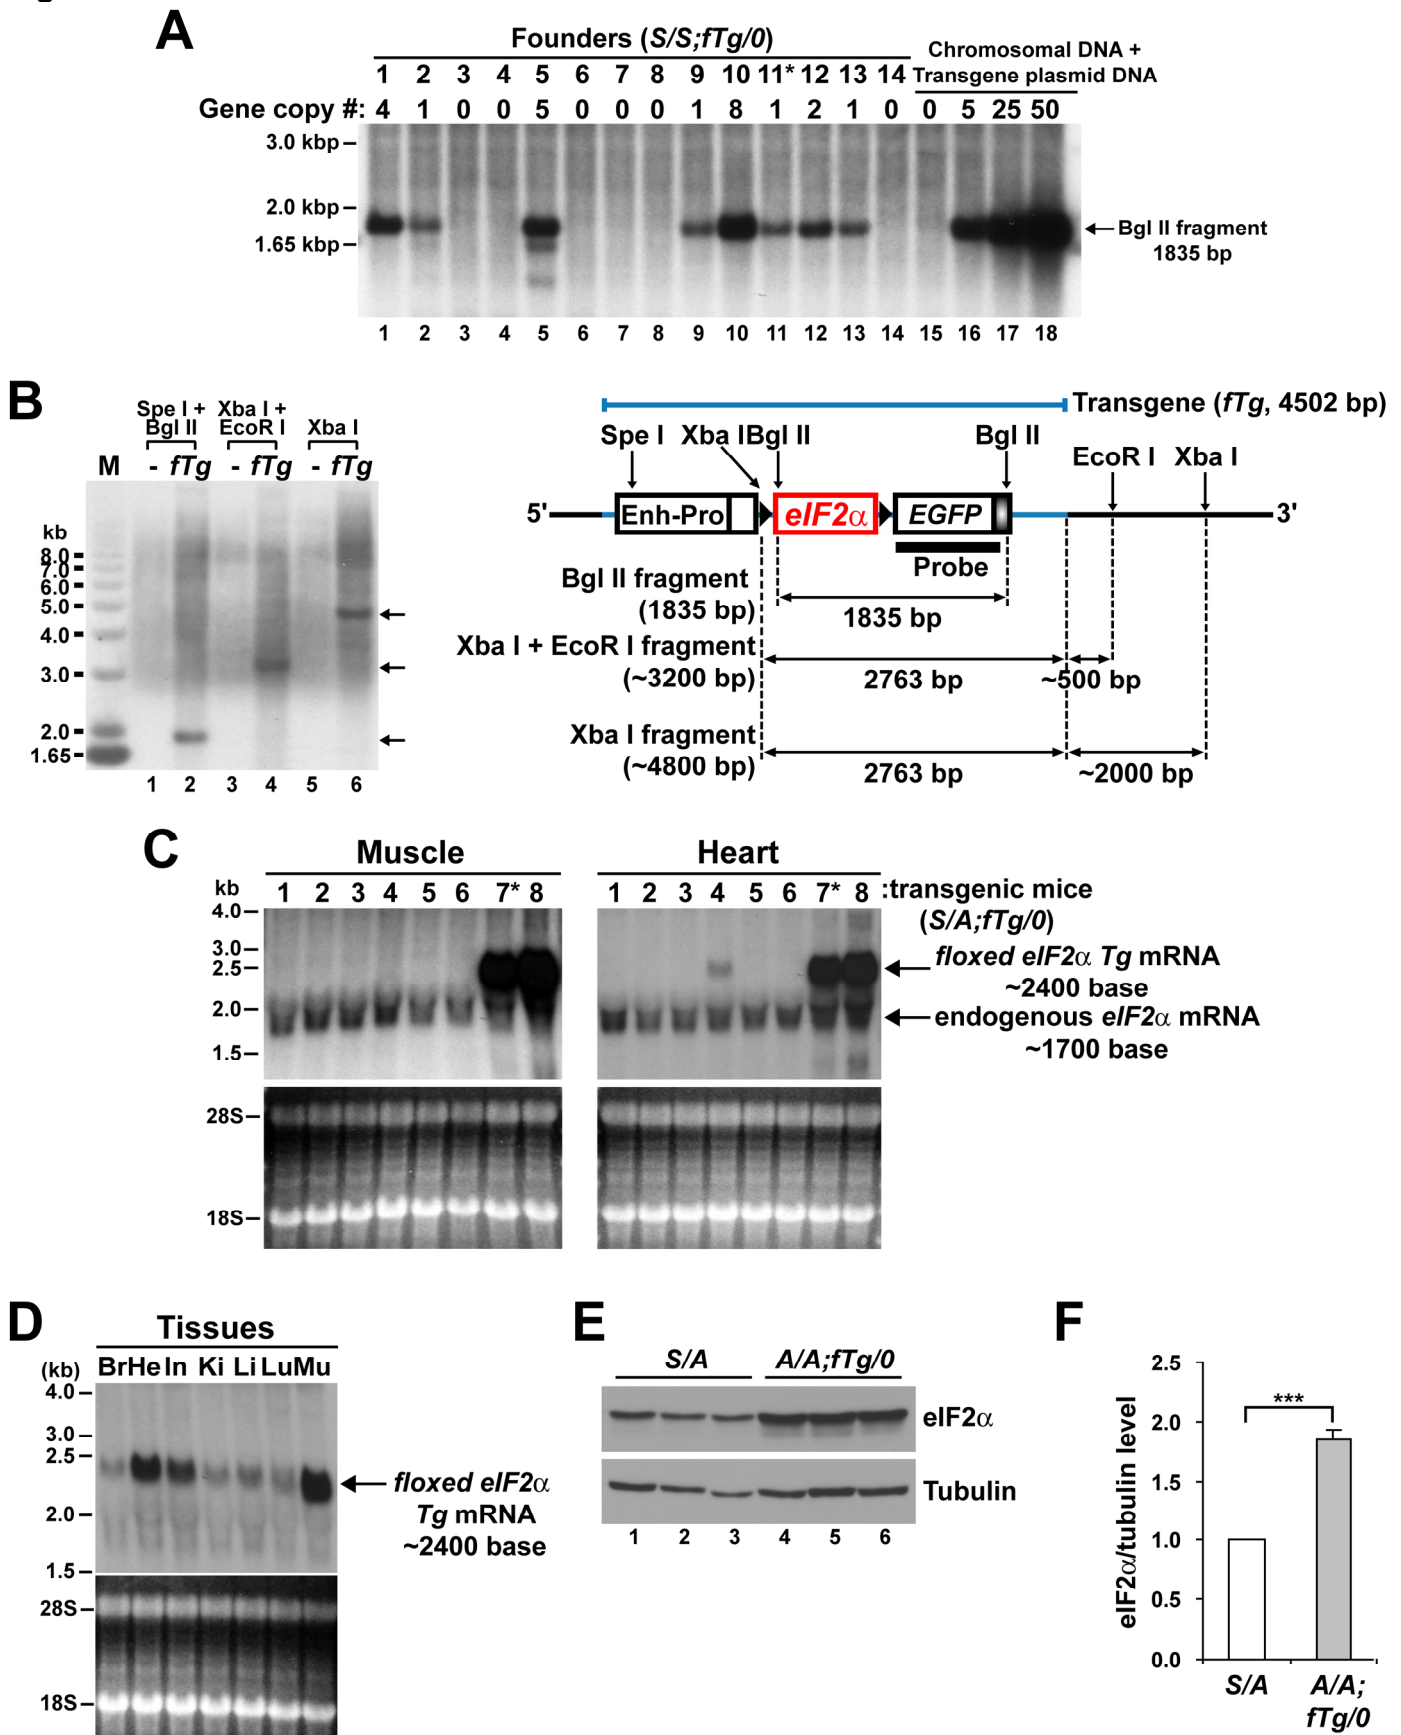

**Figure S2. Identification of a Floxed WT *eIF2 $\alpha$*  *fTg* Founder Line that Ubiquitously Expresses *fTg* mRNA from a Single-Copy Transgene**

(A) Southern blot analysis of BglIII-digested genomic DNA from different transgenic founders (*S/S;fTg/0*) was performed using *EGFP* cDNA as a hybridization probe. Transgene copy number was determined by comparison of band intensities to 0-50 copies of *fTg* plasmid DNA. Progeny from founder 11\* with a single copy *fTg* were utilized in further experiments.

(B) Transgene copy number was determined by Southern blot hybridization of genomic DNA. Three different combinations of restriction endonucleases were used to digest genomic DNA from *S/A* (lanes 1, 3, and 5) and *S/A;fTg/0* mice (lanes 2, 4, and 6). Southern blotting was performed using *EGFP* cDNA as a probe. A transgene XbaI restriction site and chromosomal restriction sites for EcoRI and XbaI that are 3' to the *fTg* integration site combine to yield single fragments of 3.2 and 4.8kb that affirm single site integration.

(C and D) Northern blot analysis (upper panels) detects *fTg* mRNA in muscle and heart tissues from founder animals (*S/A;fTg/0*) (C) and in multiple tissues (D) using *eIF2 $\alpha$*  cDNA (C) or *EGFP* cDNA (D) as hybridization probes, respectively. Animal No. 7\* (D) is progeny of Founder No. 11\* in Figure S2A and was the source of total RNA isolated from various organs at 12 wks of age. Tissues are defined as: Brain (Br), Heart (He), Intestine (In), Kidney (Ki), Liver (Li), Lung (Lu), and Muscle (Mu). Ethidium bromide staining (lower panels) is shown as a control for loading and integrity of RNA samples.

(E and F) The expression of wt *eIF2 $\alpha$*  protein derived from *floxed eIF2 $\alpha$  fTg* was measured by Western blot analysis comparing islet extracts from *A/A;fTg/0* mice and *S/A* mice.

Figure S3

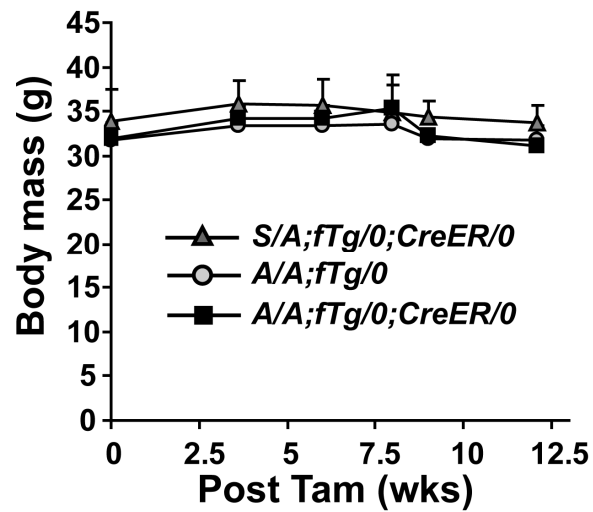

Figure S3. Body Mass Measurements for Transgene (*fTg*)-Deleted *A/A;fTg/0;CreER/0* Mice

At the indicated weeks after Tam injection, body mass measurements were performed in mice fasted for 5-6 hrs. n=5-6 mice per group. Data are Mean  $\pm$  SEM.

Figure S4

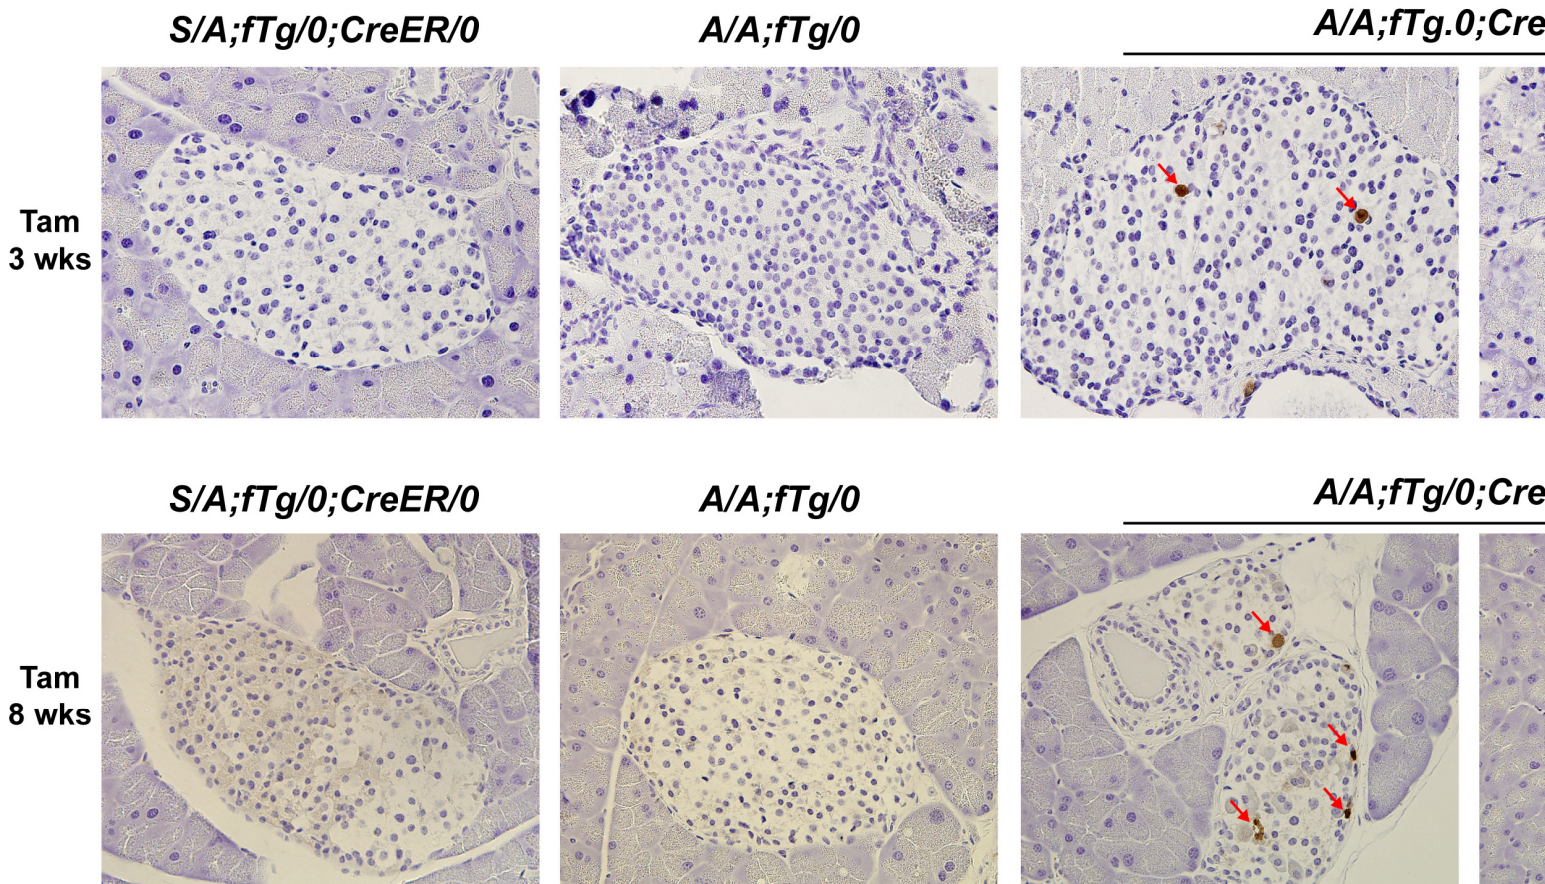

**Figure S4.  $\beta$ -Cell-Specific Deletion of WT *eIF2 $\alpha$*  *fTg* Causes  $\beta$  Cell Death**

TUNEL staining was performed on sections of pancreata harvested at 3 and 8 wks after Tam injection.  $n = 5-7$  mice per group. The scale bars represent 50  $\mu\text{m}$ .

Figure S5

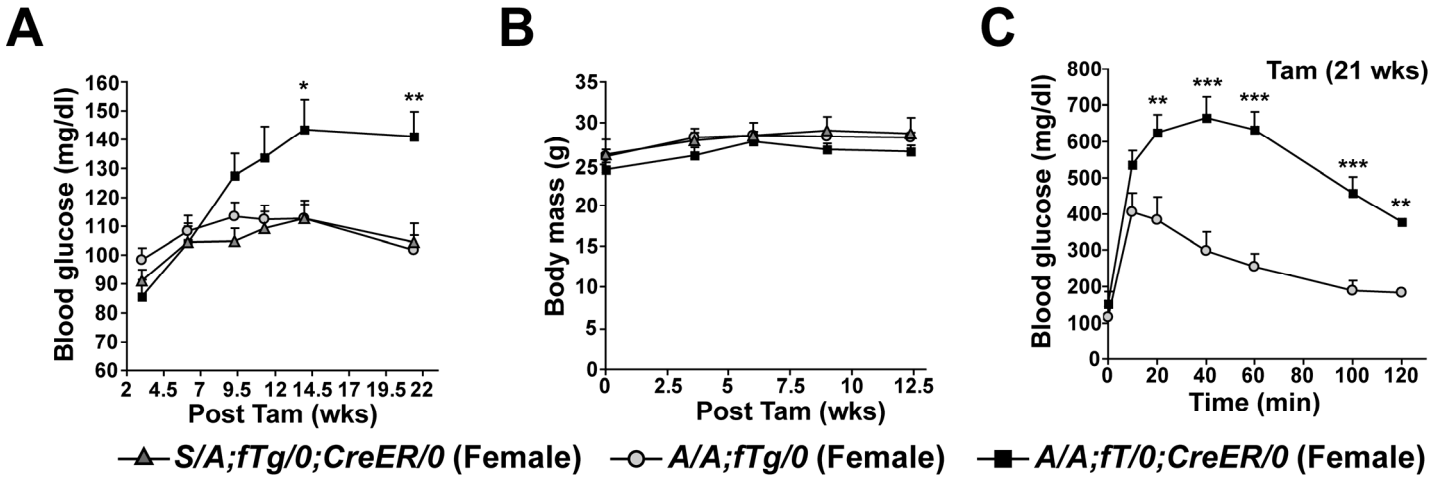

Figure S5. Deletion of *fTg* in  $\beta$  Cells of *A/A;fTg/0;CreER/0* Female Mice Causes Mild Hyperglycemia and Glucose Intolerance

(A and B) At the indicated weeks after tamoxifen injection, blood glucose (A) and body weight (B) measurements were performed in female mice fasted for 5-6 hrs. n=5-7 mice per group. (C) Glucose tolerance tests were performed 21 wks after tamoxifen administration. n=8-9 mice per group. Significant differences between *A/A;fTg/0* versus *A/A;fTg/0;CreER/0* mice are indicated. Data are Mean  $\pm$  SEM, (A-C).

Figure S6

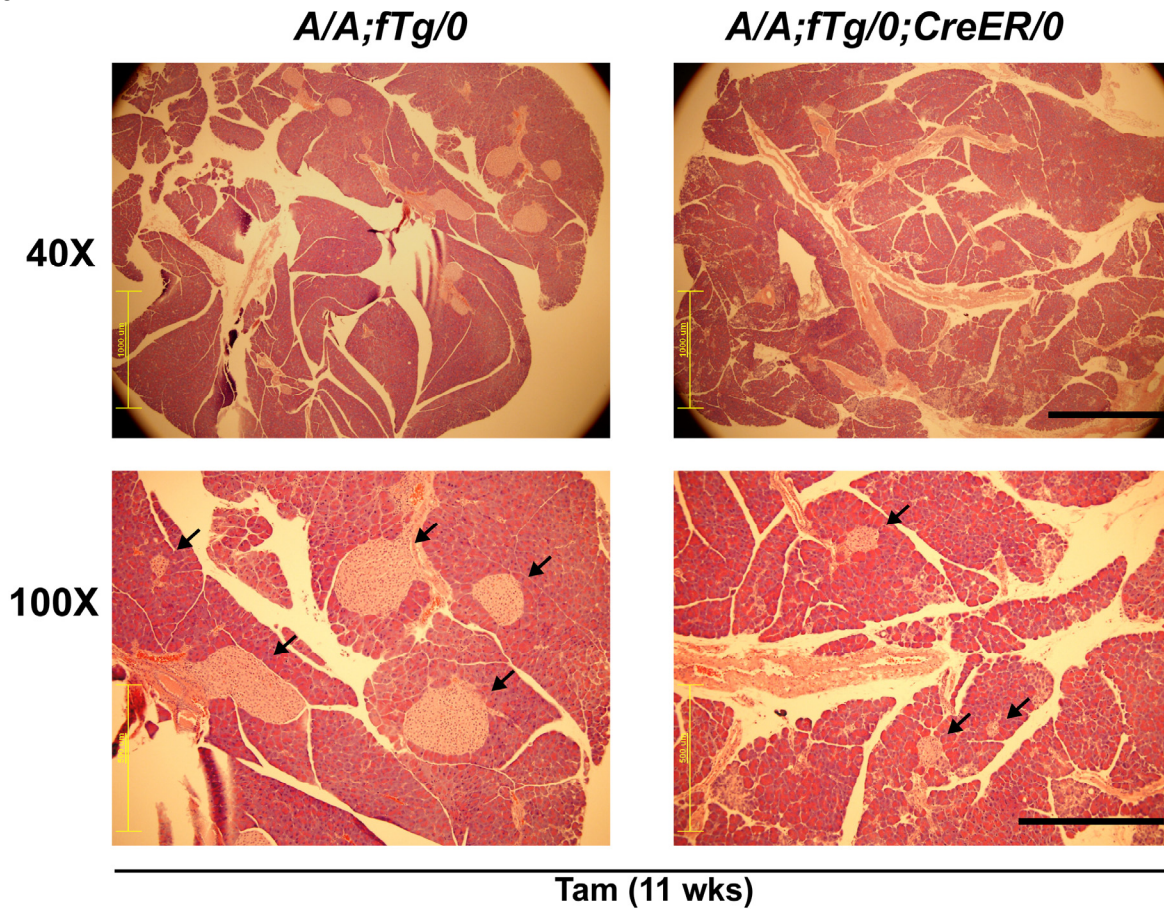

**Figure S6. Deletion of *fTg* in  $\beta$  Cells of *A/A;fTg/0;CreER/0* Mice Causes Islet Hypoplasia**

Representative images of hematoxylin and eosin (H&E) stained pancreatic tissue sections from *A/A;fTg/0* and *A/A;fTg/0;CreER/0* male mice at 11 wks after tamoxifen treatment are shown. The arrows indicate islets. The scale bar represents 1000  $\mu\text{m}$  in upper panels and 500  $\mu\text{m}$  in lower panels.



Figure S7

**A**

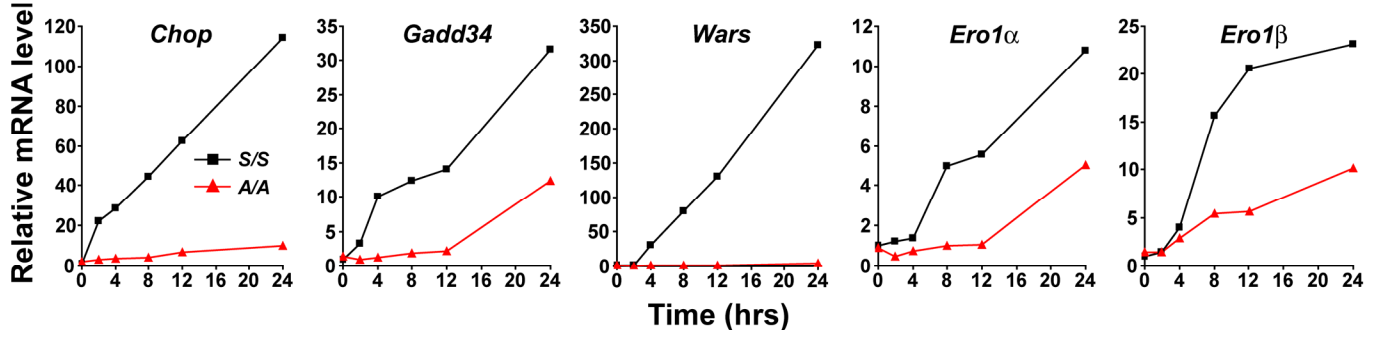

**B**

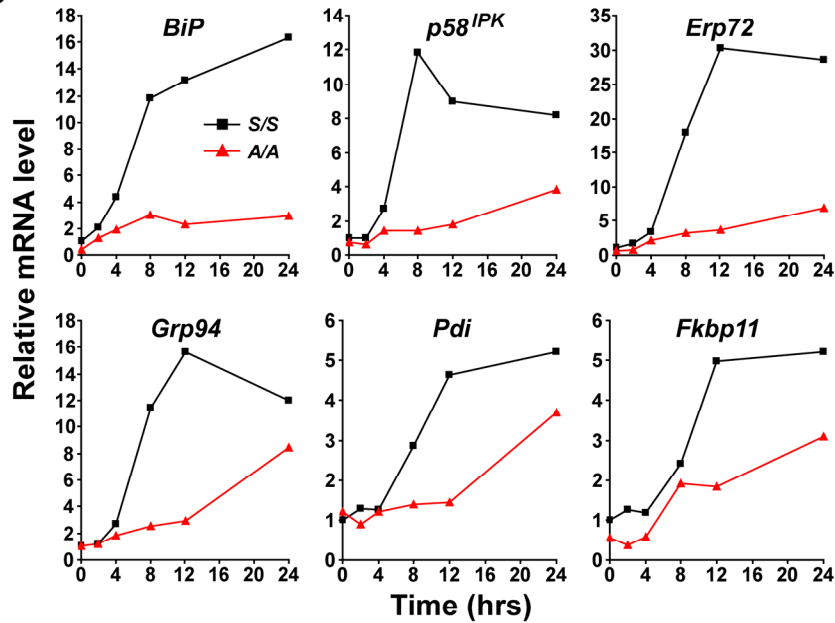

**C**

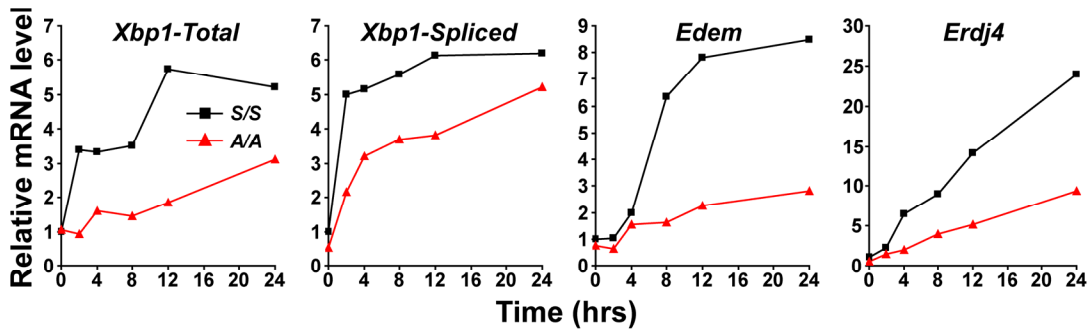

**D**

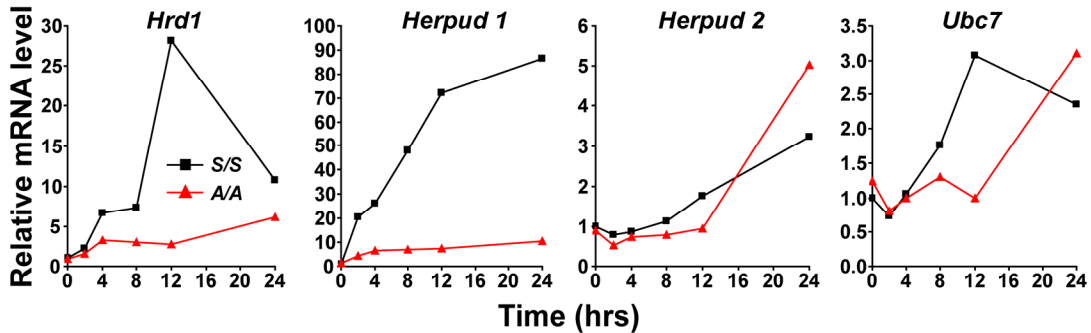

## Figure S7. Induction of Many UPR Genes Is Impaired in *eIF2 $\alpha$* A/A Hepatocytes

Total RNA was isolated from *S/S* and *A/A* hepatocytes incubated for 0-24 hrs in the absence or presence of tunicamycin (Tm, 1  $\mu$ g/ml) and was analyzed by quantitative RT-PCR. Expression values of mRNA were normalized to *beta actin* mRNA levels and expressed as fold induction versus *S/S* hepatocytes without tunicamycin (0 hr).

- (A) Genes regulated through *eIF2 $\alpha$*  phosphorylation.
- (B) Genes encoding ER chaperone functions.
- (C) Genes regulated through the IRE1 $\alpha$ /XBP1 pathway.
- (D) Genes encoding ERAD machinery.

Data are Mean  $\pm$  SEM, (A-D).

Figure S8AB

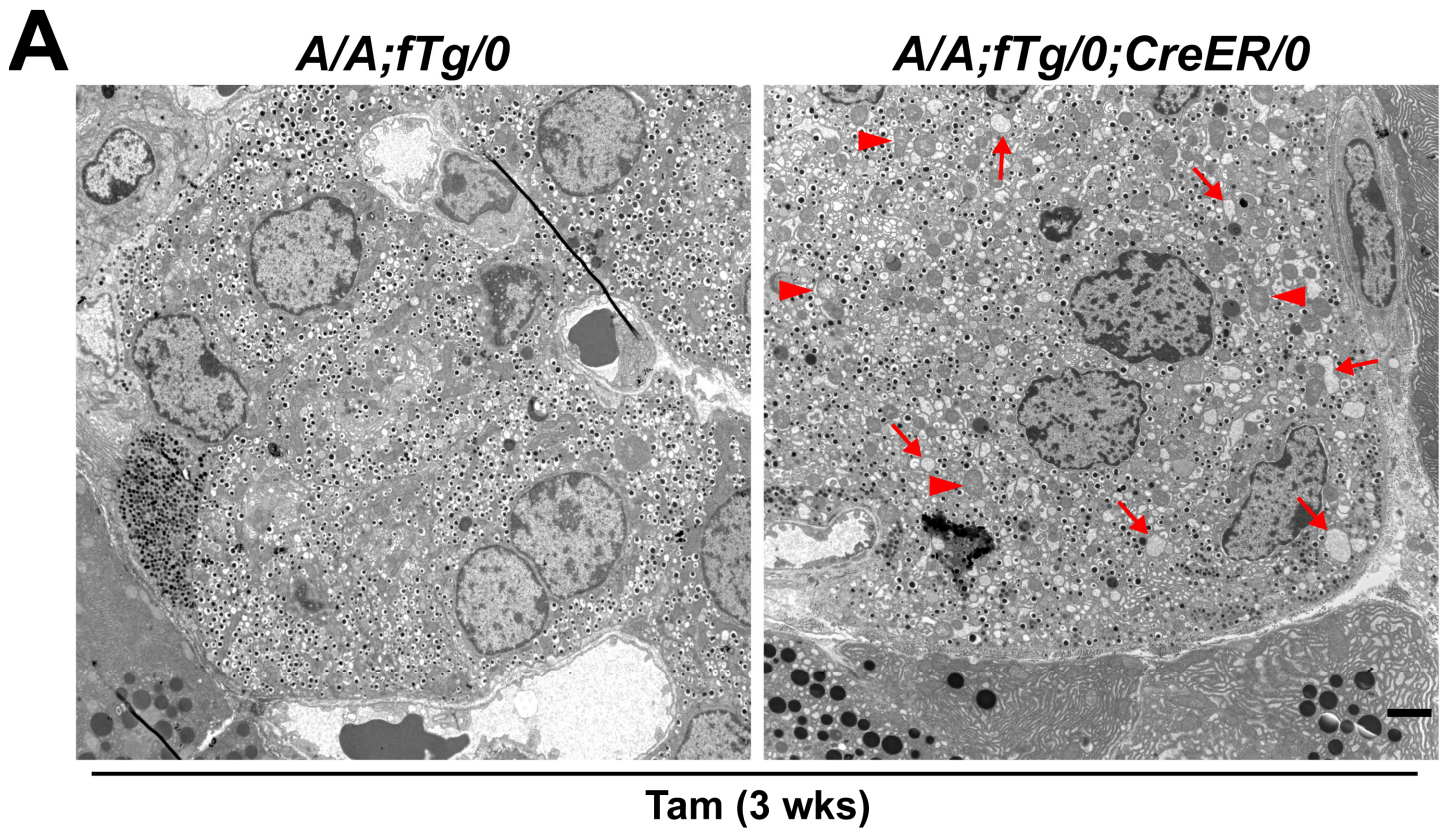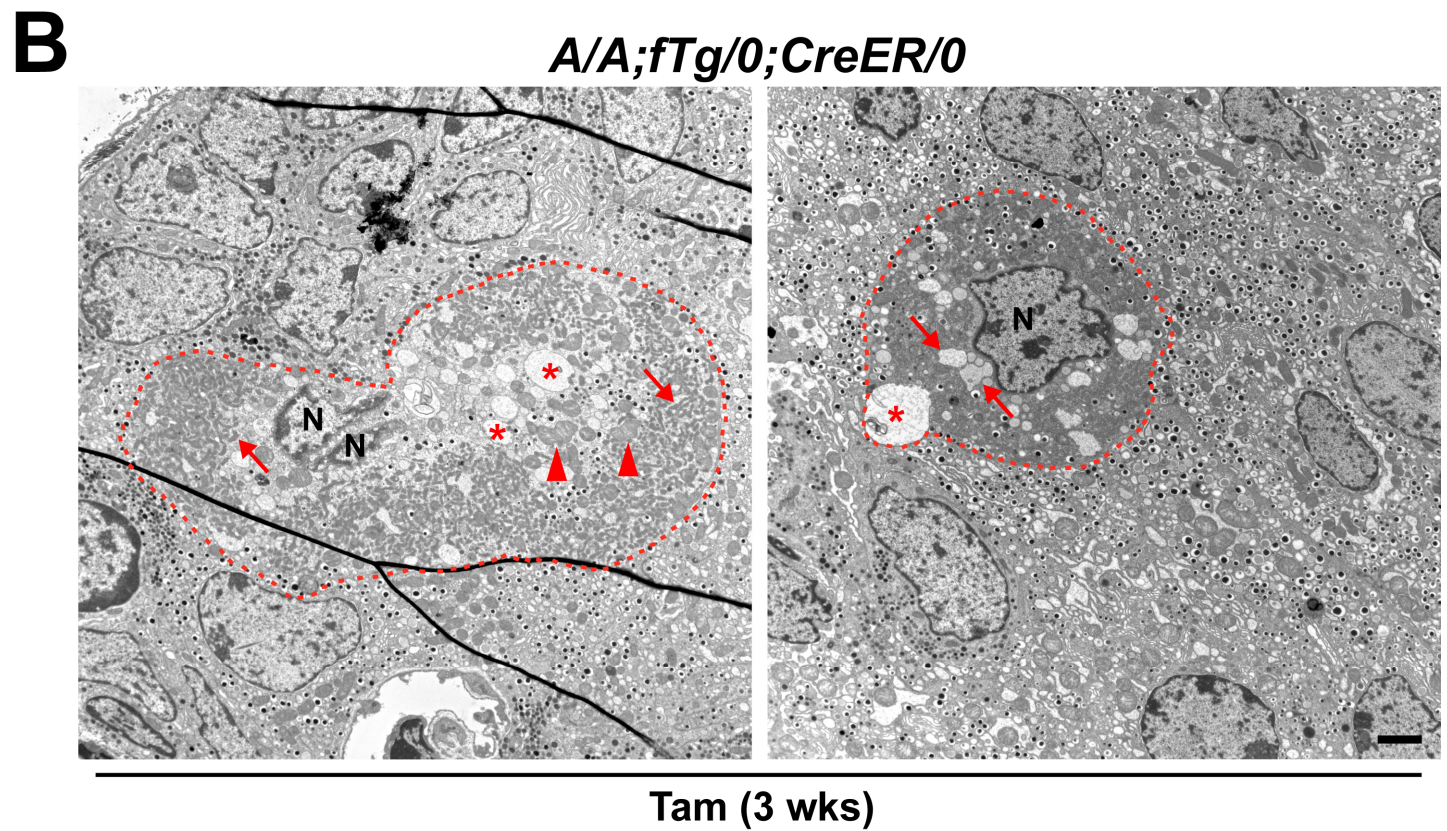

Figure S8C

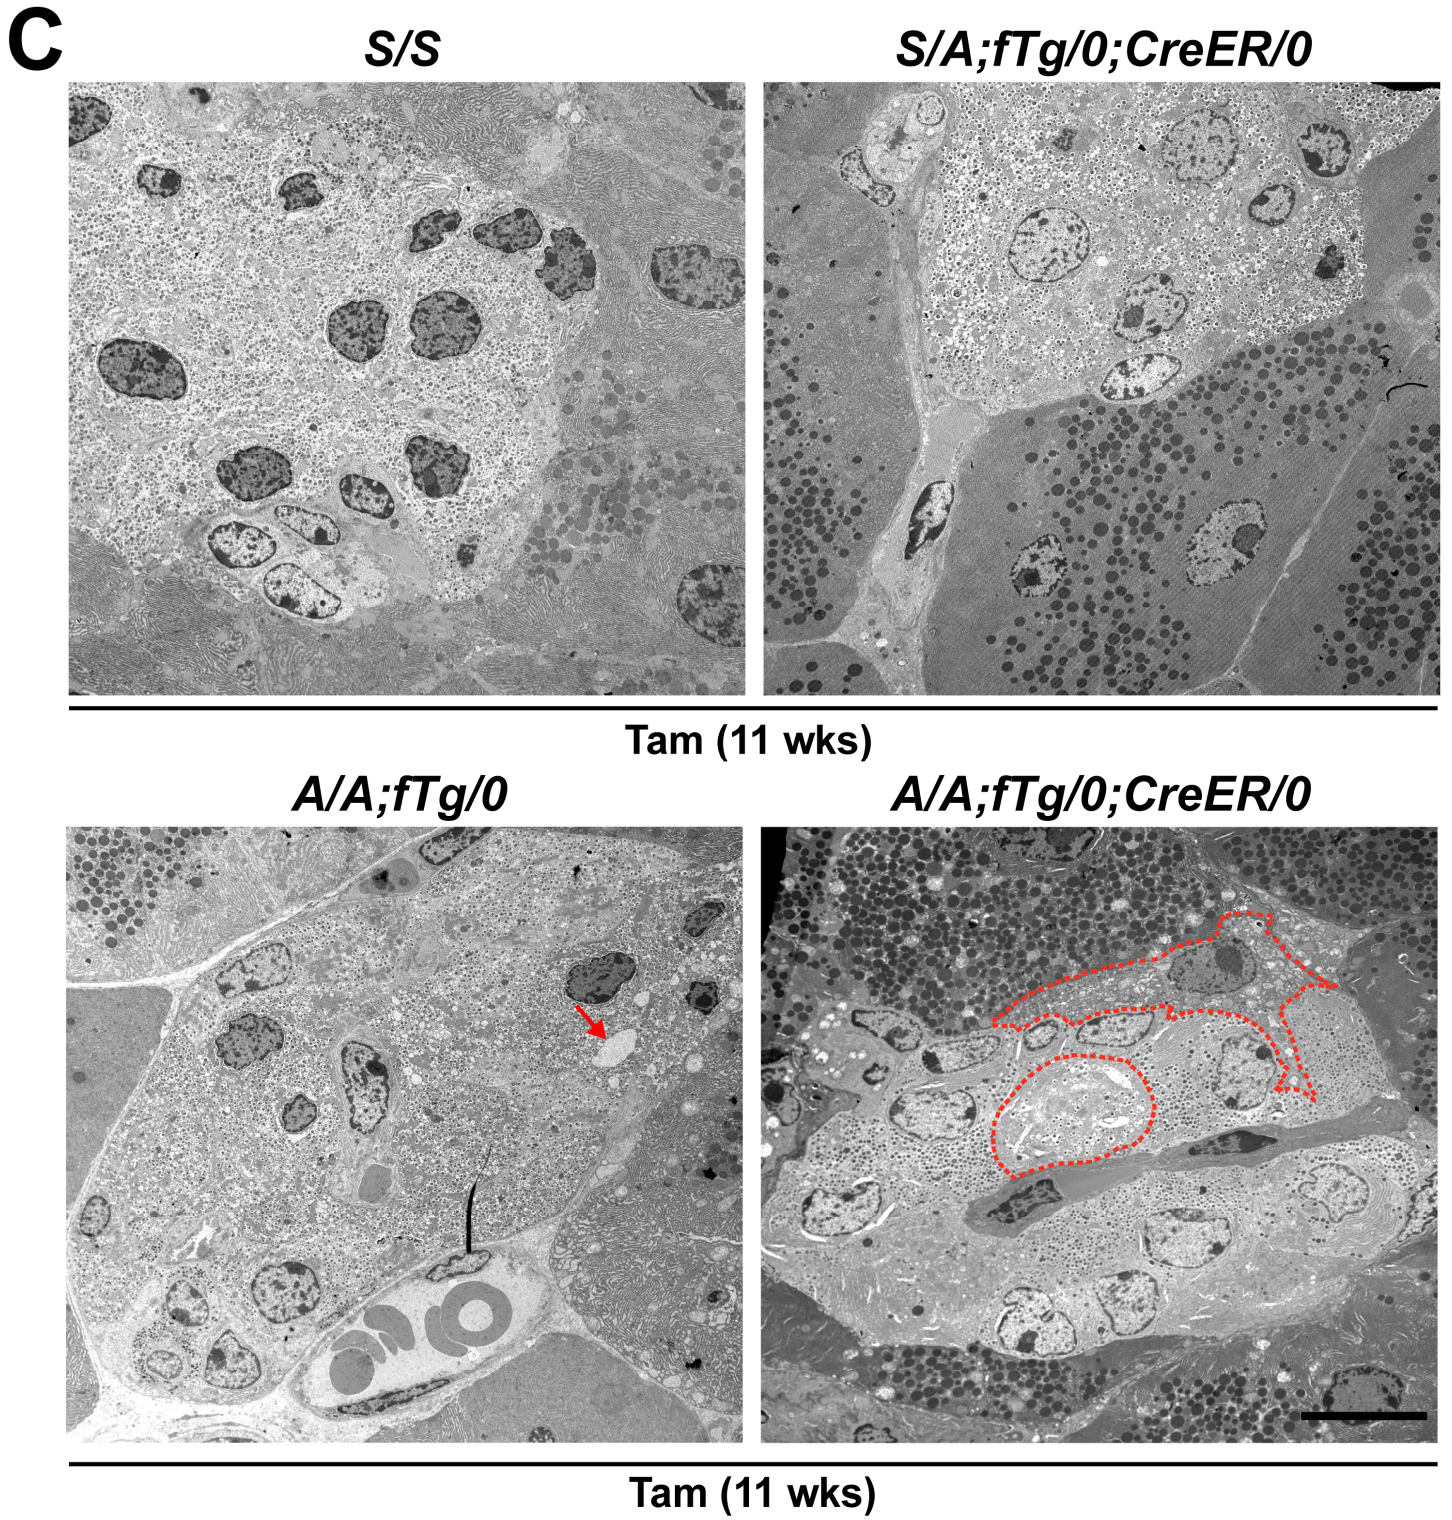

Figure S8D

**D**

**S/S**

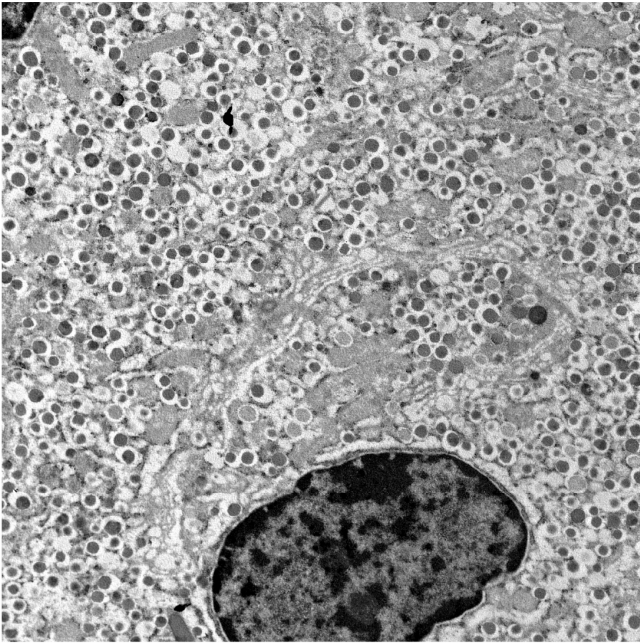

**A/A;fTg/0**

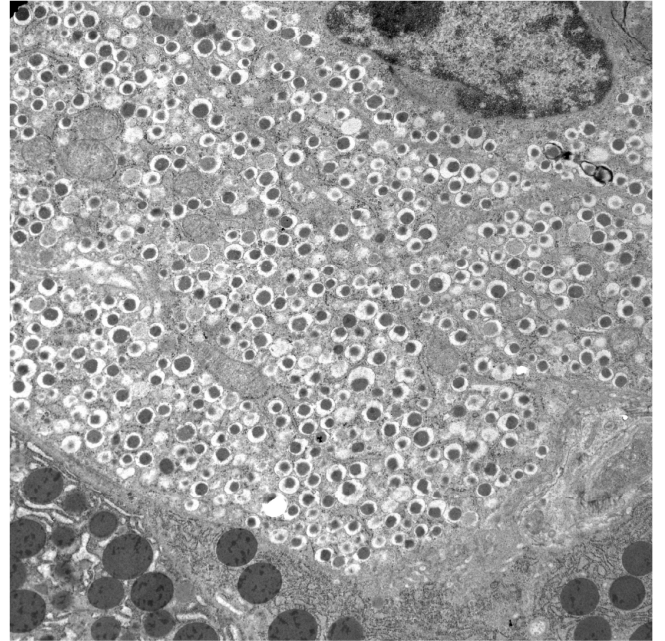

**Tam (11 wks)**

**A/A;fTg;CreER/0**

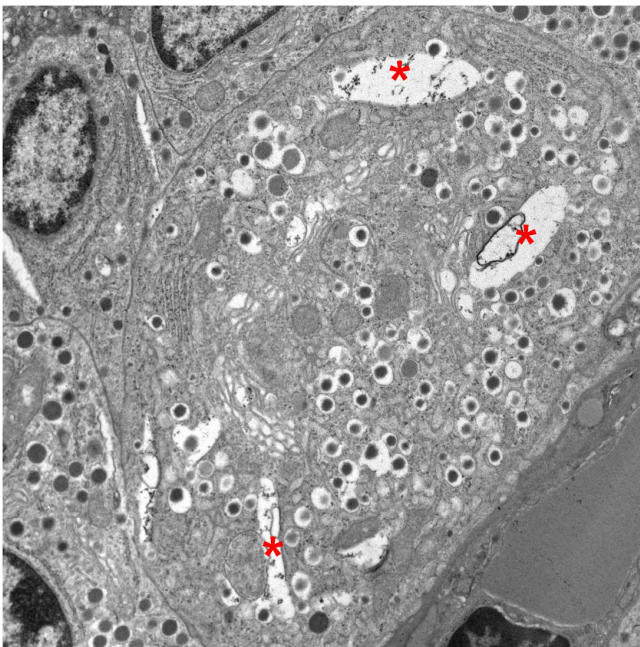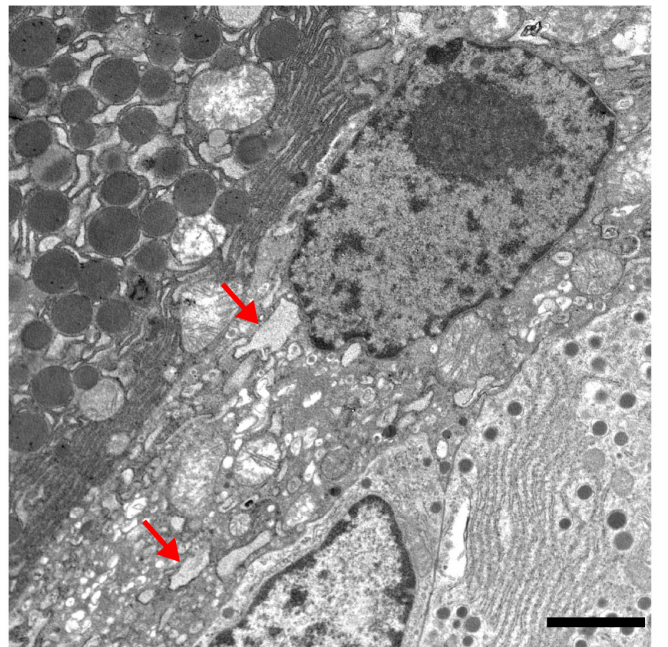

**Tam (11 wks)**

**Figure S8. Transmission Electron Microscopy Demonstrates ER Distention, Mitochondrial Swelling, and  $\beta$  Cell Enlargement in Pancreatic Sections from Tamoxifen-Treated *A/A;fTg/0;CreER/0* Mice**

Representative transmission electron micrographs are shown from sections of pancreata harvested at 3 (A and B) and 11 (C and D) wks after tamoxifen administration. The dashed lines in the Figure (B) delineate extraordinarily enlarged beta cells. Arrows indicate fragmented or dilated ER, arrowheads demark swollen mitochondria, asterisks indicate abnormal structures of low electron density, and N labels the nuclei of a swollen beta cell. The dashed lines in the fourth panel of Figure (C) delineate infrequent, extremely abnormal beta cells with a reduced number of secretory granules within *A/A;fTg/0;CreER/0* islets. The scale bars represent 2  $\mu\text{m}$ . (A, B, and D) or 10  $\mu\text{m}$  (C).

Figure S9

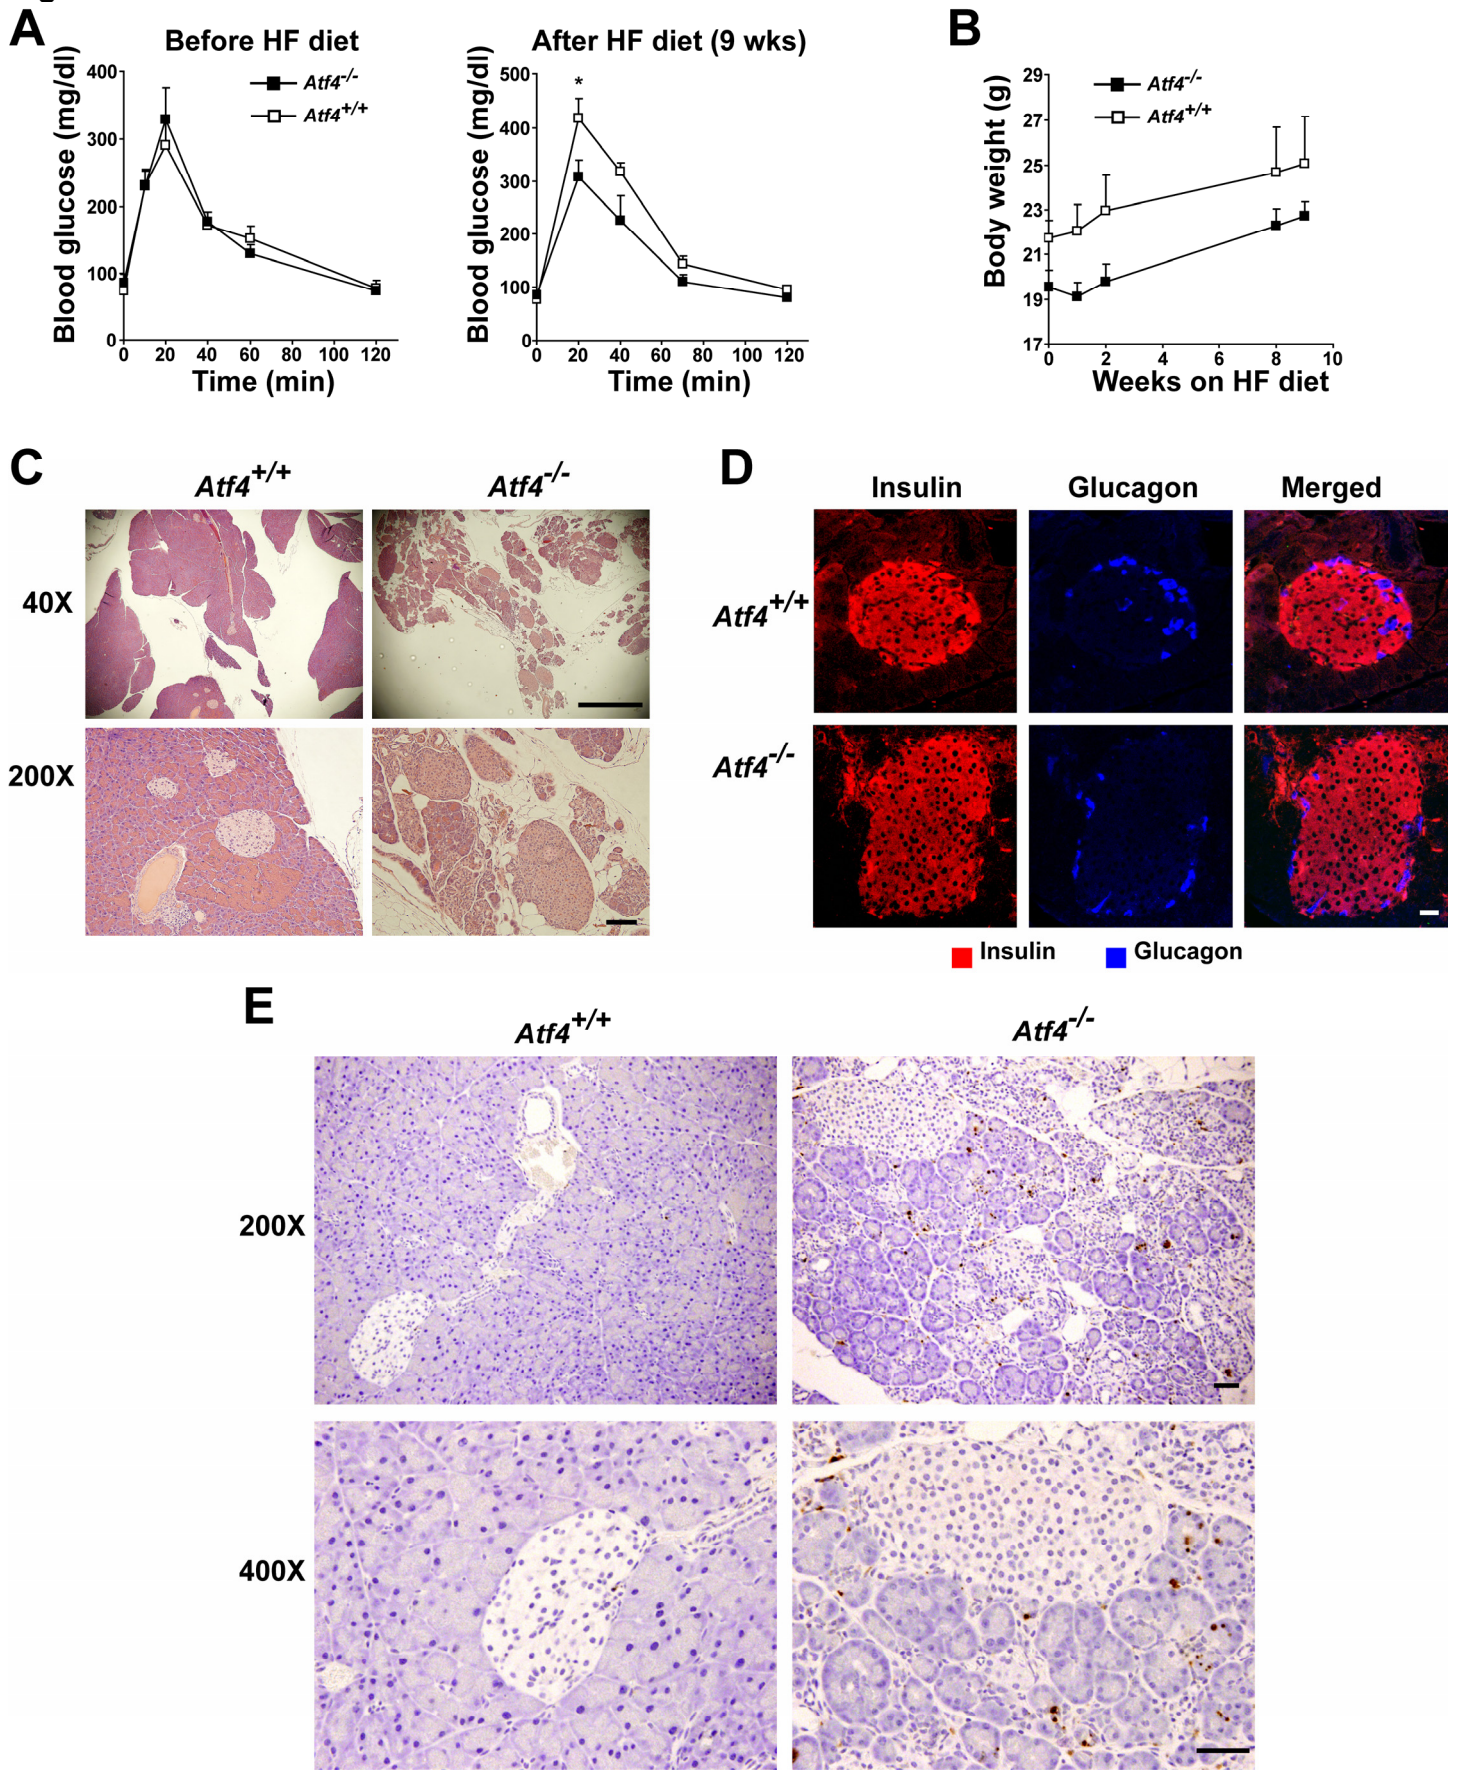

**Figure S9. Glucose Homeostasis and Islet Morphology Are Normal in *Atf4*-Null Mice, although Exocrine Tissues Are Apoptotic and Hypoplastic**

(A) Glucose tolerance tests were performed before and after 9 wks of 45% high fat diet; n=4 male mice per group.

(B) Body mass was monitored for up to 9 wks of high fat diet.

(C-E) Hematoxylin and eosin staining (C), insulin and glucagon immunolabeling (D), and TUNEL (E) was performed on pancreas tissue sections from male mice (4 month old) fed regular diet. Representative images are shown. The scale bar represents 1000  $\mu$ M, upper panels, and 100  $\mu$ m, lower panels (C), 20  $\mu$ m (D), and 100  $\mu$ M, upper panels, and 50  $\mu$ m, lower panels (E).

Data are Mean  $\pm$  SEM, (A) and (B).



Figure S10

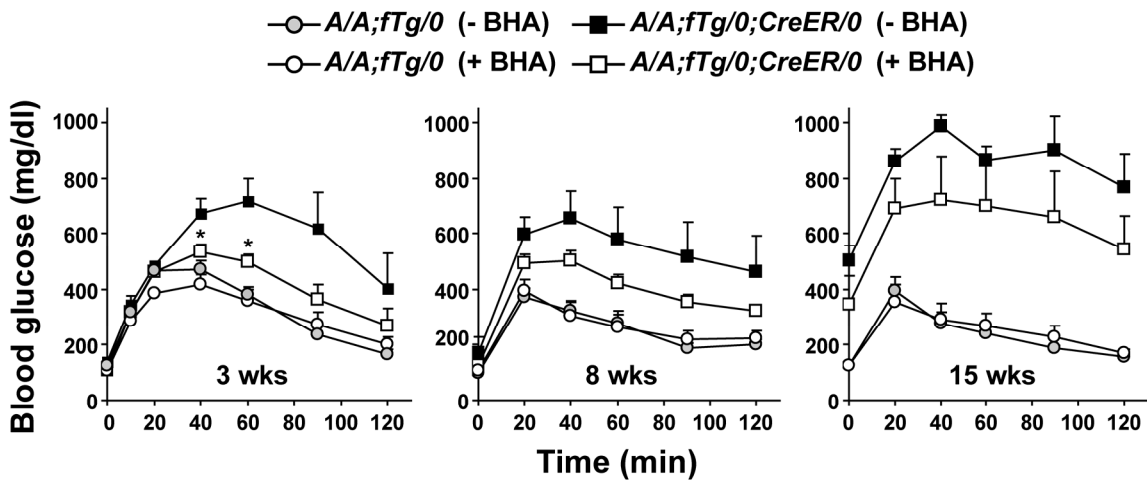

Figure S10. Antioxidant Treatment Improves Glucose Intolerance in *A/A;fTg/0;CreER/0* Mice

Glucose tolerance tests were performed on mice fed chow supplemented with or without BHA for 3-15 wks after Tam treatment. n=5-6 mice per group. Significant differences are defined: *A/A;fTg/0;CreER/0* mice (with BHA) versus *A/A;fTg/0;CreER/0* mice (without BHA), \*P < 0.05. Data are Mean  $\pm$  SEM.

Quantification of A.U.C. values is shown in main text, Figure 6A.

## Supplemental References

- Back, S.H., Lee, K., Vink, E., and Kaufman, R.J. (2006). Cytoplasmic IRE1 $\alpha$ -mediated XBP1 mRNA splicing in the absence of nuclear processing and endoplasmic reticulum stress. *J Biol Chem* 281, 18691-18706.
- Berglund, E.D., Li, C.Y., Poffenberger, G., Ayala, J.E., Fueger, P.T., Willis, S.E., Jewell, M.M., Powers, A.C., and Wasserman, D.H. (2008). Glucose metabolism in vivo in four commonly used inbred mouse strains. *Diabetes* 57, 1790-1799.
- Cano, D.A., Rulifson, I.C., Heiser, P.W., Swigart, L.B., Pelengaris, S., German, M., Evan, G.I., Bluestone, J.A., and Hebrok, M. (2008). Regulated beta-cell regeneration in the adult mouse pancreas. *Diabetes* 57, 958-966.
- Clee, S.M., and Attie, A.D. (2007). The genetic landscape of type 2 diabetes in mice. *Endocr Rev* 28, 48-83.
- D'Alessio, D.A., Verchere, C.B., Kahn, S.E., Hoagland, V., Baskin, D.G., Palmiter, R.D., and Ensinck, J.W. (1994). Pancreatic expression and secretion of human islet amyloid polypeptide in a transgenic mouse. *Diabetes* 43, 1457-1461.
- Hamanaka, R.B., Bennett, B.S., Cullinan, S.B., and Diehl, J.A. (2005). PERK and GCN2 contribute to eIF2 $\alpha$  phosphorylation and cell cycle arrest after activation of the unfolded protein response pathway. *Mol Biol Cell* 16, 5493-5501.
- Hettmann, T., Barton, K., and Leiden, J.M. (2000). Microphthalmia due to p53-mediated apoptosis of anterior lens epithelial cells in mice lacking the CREB-2 transcription factor. *Dev Biol* 222, 110-123.
- Jiang, H.Y., Wek, S.A., McGrath, B.C., Lu, D., Hai, T., Harding, H.P., Wang, X., Ron, D., Cavener, D.R., and Wek, R.C. (2004). Activating transcription factor 3 is integral to the eukaryotic initiation factor 2 kinase stress response. *Mol Cell Biol* 24, 1365-1377.
- Lee, K., Tirasophon, W., Shen, X., Michalak, M., Prywes, R., Okada, T., Yoshida, H., Mori, K., and Kaufman, R.J. (2002). IRE1-mediated unconventional mRNA splicing and S2P-mediated ATF6 cleavage merge to regulate XBP1 in signaling the unfolded protein response. *Genes Dev* 16, 452-466.
- Mathews, C.E., Bagley, R., and Leiter, E.H. (2004). ALS/Lt: a new type 2 diabetes mouse model associated with low free radical scavenging potential. *Diabetes* 53 Suppl 1, S125-129.
- Nir, T., Melton, D.A., and Dor, Y. (2007). Recovery from diabetes in mice by beta cell regeneration. *J Clin Invest* 117, 2553-2561.
- Onuki, R., Bando, Y., Suyama, E., Katayama, T., Kawasaki, H., Baba, T., Tohyama, M., and Taira, K. (2004). An RNA-dependent protein kinase is involved in tunicamycin-induced apoptosis and Alzheimer's disease. *EMBO J* 23, 959-968.
- Sakaki, K., Wu, J., and Kaufman, R.J. (2008). Protein kinase C $\theta$  is required for autophagy in response to stress in the endoplasmic reticulum. *J Biol Chem* 283, 15370-15380.
- Scheuner, D., Song, B., McEwen, E., Liu, C., Laybutt, R., Gillespie, P., Saunders, T., Bonner-Weir, S., and Kaufman, R.J. (2001). Translational control is required for the unfolded protein response and in vivo glucose homeostasis. *Mol Cell* 7, 1165-1176.
- Srivastava, S.P., Davies, M.V., and Kaufman, R.J. (1995). Calcium depletion from the endoplasmic reticulum activates the double-stranded RNA-dependent protein kinase (PKR) to inhibit protein synthesis. *J Biol Chem* 270, 16619-16624.
- Zhang, W., Feng, D., Li, Y., Iida, K., McGrath, B., and Cavener, D.R. (2006). PERK EIF2AK3 control of pancreatic beta cell differentiation and proliferation is required for postnatal glucose homeostasis. *Cell Metab* 4, 491-497.
- Zraika, S., Aston-Mourney, K., Laybutt, D.R., Kebede, M., Dunlop, M.E., Proietto, J., and Andrikopoulos, S. (2006). The influence of genetic background on the induction of oxidative stress and impaired insulin secretion in mouse islets. *Diabetologia* 49, 1254-1263.
